# Supplementary material for: Phase I Trial of Prophylactic Donor-Derived IL-2-Activated NK Cell Infusion after Allogeneic Hematopoietic Stem Cell Transplantation from a Matched Sibling Donor
Source: MDPI journal article supplement (doi:10.3390/cancers13112673), 2021-05-28
Supplement: s1 [file s1]

**Supplementary table S1: NK cell count and purity at different step of the IL-2 NK manufacturing.**

| UPN | NK cells (10 <sup>6</sup> /kg) |                 |                       | NK cell purity (%) |                 |                       | CD3+ cells (10 <sup>4</sup> /kg) in the final product |
|-----|--------------------------------|-----------------|-----------------------|--------------------|-----------------|-----------------------|-------------------------------------------------------|
|     | Before isolation               | After isolation | After culture in IL-2 | Before isolation   | After isolation | After culture in IL-2 |                                                       |
| #01 | 12.2                           | 6.7             | 1.2                   | 6%                 | 92%             | 90%                   | 1.2                                                   |
| #02 | 27.2                           | 12.9            | 2.9                   | 10%                | 80%             | 96%                   | 0.3                                                   |
| #03 | 15.8                           | 11.7            | 6.4                   | 8%                 | 93%             | 92%                   | 1.5                                                   |
| #04 | 12.8                           | 5.7             | 4.6                   | 4%                 | 81%             | 97%                   | 0.5                                                   |
| #05 | 15.4                           | 8.8             | 4.4                   | 7%                 | 97%             | 94%                   | 0.3                                                   |
| #06 | 21.4                           | 10.5            | 7.6                   | 7%                 | 96%             | 96%                   | 0.4                                                   |
| #07 | 16.0                           | 9.5             | 4.2                   | 8%                 | 94%             | 96%                   | 0.7                                                   |
| #08 | 29.5                           | 21.6            | 4.8                   | 7%                 | 96%             | 96%                   | 0.6                                                   |
| #09 | 17.0                           | 12.1            | 9.5                   | 9%                 | 96%             | 95%                   | 0.5                                                   |
| #10 | 4.9                            | 4.1             | 3.0                   | 5%                 | 97%             | 92%                   | 0.2                                                   |
| #11 | 23.2                           | 9.3             | 4.8                   | 5%                 | 95%             | 93%                   | 0.0                                                   |
| #12 | 53.4                           | 31.3            | 11.3                  | 8%                 | 97%             | 94%                   | 0.0                                                   |
| #13 | 38.4                           | 26.4            | 1.3                   | 13%                | 94%             | 95%                   | 0.1                                                   |
| #14 | 20.1                           | 12.4            | 5.4                   | 9%                 | 91%             | 75%                   | 1.2                                                   |
| #15 | 22.6                           | 10.1            | 6.4                   | 7%                 | 99%             | 99%                   | 0.4                                                   |
| #16 | 17.5                           | 14.8            | 7.9                   | 10%                | 97%             | 98%                   | 0.2                                                   |

For UPN #01, #02 and #03 only a portion of isolated NK cells have been activated in IL-2 (respectively: 4.6, 6.6, and 4.5 x 10<sup>6</sup>/kg) because of the low targeted dose. NK cell purity was assessed by gating on viable CD56<sup>+</sup>CD3<sup>-</sup> cells.

**Supplementary table S2: NK cell phenotype before (day+0) vs. after (day+1) IL-2 NK cell infusion**

| Markers       | Frequency of positive NK cell |              |        |             | p     |
|---------------|-------------------------------|--------------|--------|-------------|-------|
|               | Day 0                         |              | Day 1  |             |       |
|               | Median                        | Range        | Median | Range       |       |
| DNAM          | 72.05%                        | (46.7-96.7)  | 72.35% | (43.4-86.6) | 0.233 |
| NKG2D         | 93.75%                        | (55.2-98.7)  | 93.95% | (52.1-99)   | 0.894 |
| NKp30         | 73.9%                         | (31.3-99.3)  | 76.75% | (29.8-90.1) | 0.470 |
| NKp46         | 44.95%                        | (22.6-85.5)  | 52.9%  | (16.3-83.3) | 0.910 |
| CD25          | 0.7%                          | (0-62.4)     | 0.6%   | (0-63.7)    | 0.683 |
| CD69          | 24.1%                         | (6.3-59.2)   | 21.3%  | (7.8-52.9)  | 0.966 |
| DR            | 22.9%                         | (0.6-85.9)   | 25.1%  | (1-81.8)    | 0.083 |
| NKp44         | 5.5%                          | (1.6-18.3)   | 6.9%   | (2.3-14.7)  | 0.123 |
| CD57          | 34.1%                         | (3.9-53)     | 38.6%  | (21.2-58.9) | 0.014 |
| KIR2DL1S1     | 10.2%                         | (4.1-15.1)   | 12.2%  | (3-18.5)    | 0.032 |
| KIR2DL3L2S2   | 24.8%                         | (2.5-29.8)   | 27.5%  | (7.7-44.3)  | 0.014 |
| KIR3DL1       | 5.1%                          | (1.4-29.2)   | 10.2%  | (1.7-36.8)  | 0.014 |
| NKG2C         | 17.5%                         | (6.9-27.7)   | 15.4%  | (6.4-38.4)  | 0.859 |
| NKG2A         | 68.7%                         | (50.6-88.6)  | 66.9%  | (45.4-88.4) | 0.123 |
| CD107a        | 15.8%                         | (9.63-53.1)  | 27.2%  | (12.6-56.4) | 0.102 |
| IFN- $\gamma$ | 1.23%                         | (0.061-23.1) | 4.14%  | (0.07-8.53) | 0.147 |
| MIP-1 $\beta$ | 28%                           | (7.84-69.8)  | 39.4%  | (14.1-68.1) | 0.240 |
| TNF- $\alpha$ | 2.74%                         | (0.073-20.3) | 6.38%  | (0.33-13.5) | 0.102 |
